# Supplementary material for: Evolution of digestive enzymes and dietary diversification in birds
Source: PeerJ journal article supplement (doi:10.7717/peerj.6840), 2019-04-25

**Food component**

- Seeds
- Meat
- Insects
- Fruits and nectar
- Other plant materials

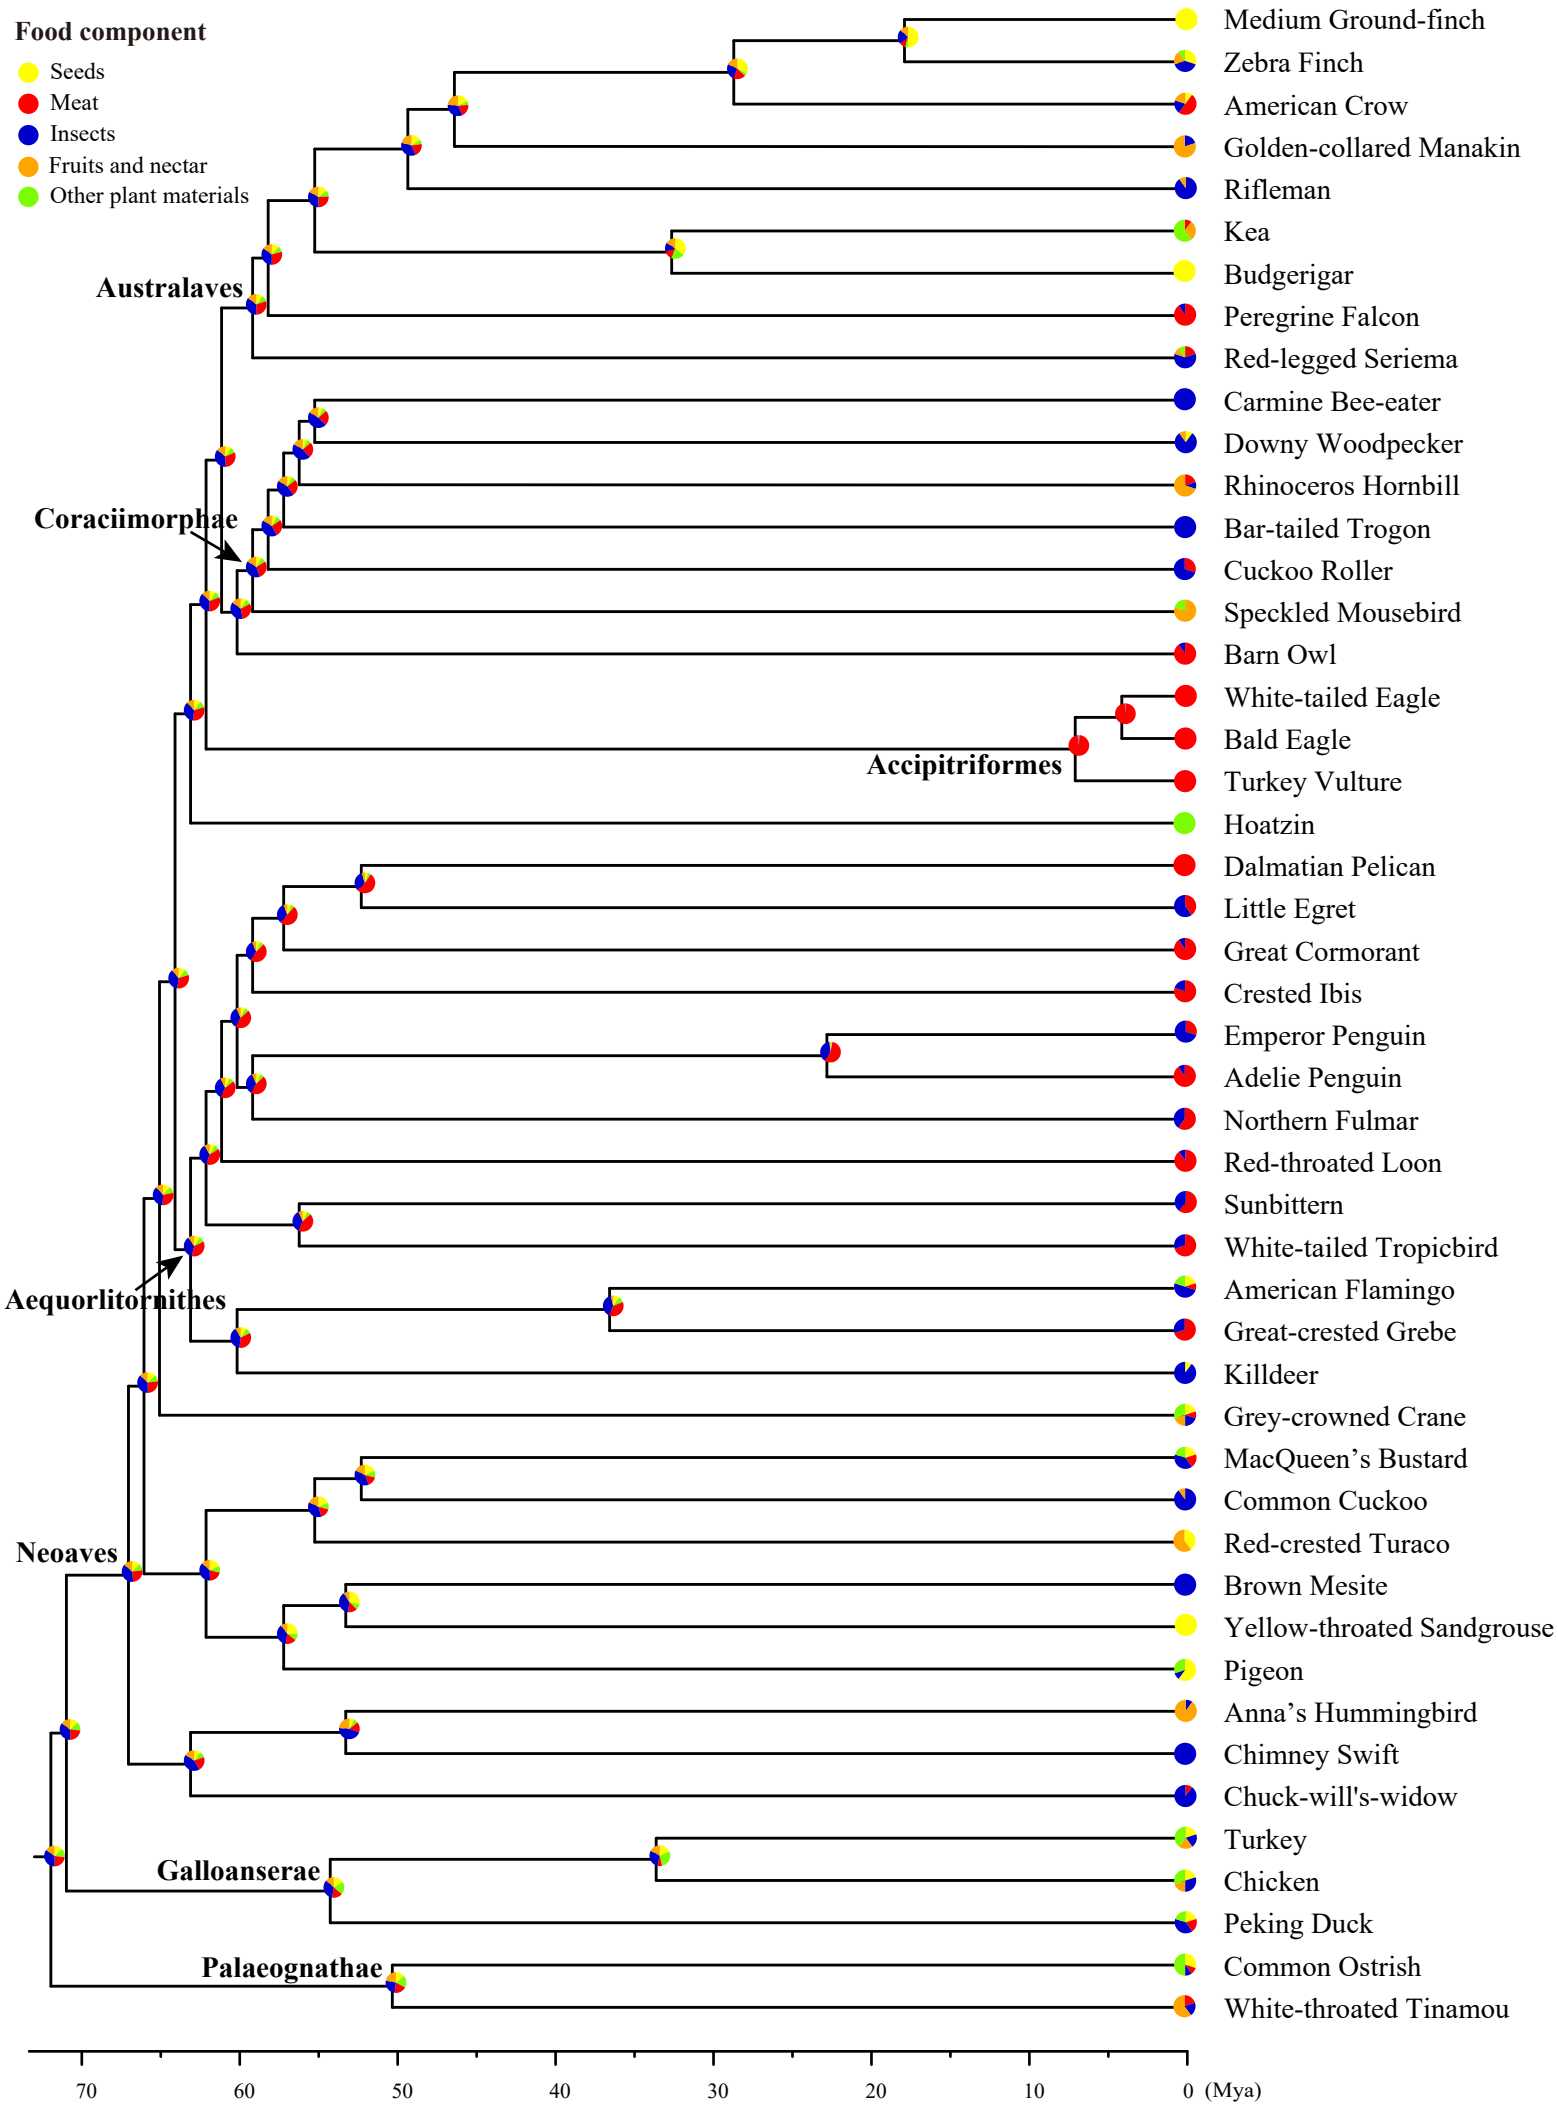

Supplement: Supplemental_Figure_S8.pdf [file Supplemental_Figure_S8.pdf]
